# Supplementary material for: Comparison of different selection traits for identification of phosphorus use efficient lines in mungbean
Source: PeerJ. 2021 Oct 8;9:e12156. doi: 10.7717/peerj.12156 (PMC8504459; doi:10.7717/peerj.12156)
Supplement: Supplemental Information 6 [file peerj-09-12156-s006.xls]

## Sheet: Sheet1
S. No	Name	TDW	PUTE
1	EC 520029	0.233333	0.140398
2	EC 550851	0.156667	0.10156
3	GANGA 1	0.233333	0.13723
4	IC 282094	0.106667	0.148811
5	IPM 02-17	0.28	0.165005
6	IPM 02-3	0.253333	0.162675
7	IPM 205-4	0.226667	0.148415
8	KM 16-69	0.263333	0.130705
9	KM 16-80	0.233333	0.135194
10	LGG 460	0.186667	0.126596
11	M 1032	0.19	0.155459
12	M 1129	0.233333	0.138384
13	M 1209	0.181667	0.172936
14	M 1316	0.126667	0.124721
15	M 1443	0.151667	0.186983
16	M 209	0.138333	0.131569
17	M 512	0.196667	0.130467
18	M 961	0.146667	0.129968
19	MH 810	0.213333	0.0910319
20	MH 934	0.156667	0.129111
21	ML 1451	0.164	0.142819
22	ML 1666	0.165	0.124271
23	ML 818	0.233333	0.134954
24	MUSKAN	0.226667	0.124126
25	PDM 139	0.266667	0.148144
26	PLM 167	0.236667	0.144162
27	PUSA 1031	0.282333	0.0933788
28	PUSA 1132	0.223333	0.138921
29	PUSA 1333	0.546667	0.114365
30	PUSA BAISAKHI	0.196667	0.12022
31	PUSA RATNA	0.29	0.115815
32	PUSA VISHAL	0.383333	0.112149
33	RMG 1028	0.206667	0.145535
34	RMG 1087	0.166667	0.164502
35	V 04-04	0.226667	0.14593
36	V 6183	0.19	0.110387
