# Supplementary material for: Comparison of different selection traits for identification of phosphorus use efficient lines in mungbean
Source: PeerJ. 2021 Oct 8;9:e12156. doi: 10.7717/peerj.12156 (PMC8504459; doi:10.7717/peerj.12156)
Supplement: Supplemental Information 8 [file peerj-09-12156-s008.xls]

## Sheet: Sheet1
S. No	Name	TDW	TPU
1	EC 520029	0.233333	1.66365
2	EC 550851	0.156667	1.54875
3	GANGA 1	0.233333	1.704
4	IC 282094	0.106667	0.71685
5	IPM 02-17	0.28	1.8075
6	IPM 02-3	0.253333	1.65915
7	IPM 205-4	0.226667	1.54898
8	KM 16-69	0.263333	2.04075
9	KM 16-80	0.233333	1.72133
10	LGG 460	0.186667	1.4766
11	M 1032	0.19	1.2258
12	M 1129	0.233333	1.7079
13	M 1209	0.181667	1.0587
14	M 1316	0.126667	1.02045
15	M 1443	0.151667	0.818025
16	M 209	0.138333	1.0524
17	M 512	0.196667	1.5075
18	M 961	0.146667	1.12665
19	MH 810	0.213333	2.36265
20	MH 934	0.156667	1.20825
21	ML 1451	0.164	1.14843
22	ML 1666	0.165	1.3278
23	ML 818	0.233333	1.72935
24	MUSKAN	0.226667	1.83315
25	PDM 139	0.266667	1.81485
26	PLM 167	0.236667	1.65592
27	PUSA 1031	0.282333	3.10899
28	PUSA 1132	0.223333	1.60755
29	PUSA 1333	0.546667	4.7928
30	PUSA BAISAKHI	0.196667	1.63455
31	PUSA RATNA	0.29	2.57355
32	PUSA VISHAL	0.383333	3.46418
33	RMG 1028	0.206667	1.4322
34	RMG 1087	0.166667	1.04715
35	V 04-04	0.226667	1.55497
36	V 6183	0.19	1.72275
