# Supplementary material for: Comparison of different selection traits for identification of phosphorus use efficient lines in mungbean
Source: PeerJ. 2021 Oct 8;9:e12156. doi: 10.7717/peerj.12156 (PMC8504459; doi:10.7717/peerj.12156)
Supplement: Supplemental Information 9 [file peerj-09-12156-s009.xls]

## Sheet: Sheet1
S. No	Name	SSI	MPI	GMPI	HMI	STI	TI	SI
1	EC 520029	1.97884	0.176667	0.167332	0.158491	0.578512	0.113333	0.514286
2	EC 550851	0.866824	0.14	0.139004	0.138016	0.399219	0.0333333	0.787234
3	GANGA 1	1.04762	0.203333	0.201108	0.198907	0.835629	0.06	0.742857
4	IC 282094	0.636574	0.0983333	0.0979796	0.0976271	0.198347	0.0166667	0.84375
5	IPM 02-17	1.21252	0.238333	0.234663	0.231049	1.13774	0.0833333	0.702381
6	IPM 02-3	0.536062	0.236667	0.236079	0.235493	1.15152	0.0333333	0.868421
7	IPM 205-4	0.958606	0.2	0.198214	0.196444	0.811754	0.0533333	0.764706
8	KM 16-69	0.670417	0.241667	0.240693	0.239724	1.19697	0.0433333	0.835443
9	KM 16-80	1.28042	0.196667	0.193218	0.189831	0.77135	0.0733333	0.685714
10	LGG 460	0.945767	0.165	0.163571	0.162155	0.552801	0.0433333	0.767857
11	M 1032	0.8577	0.17	0.168819	0.167647	0.588843	0.04	0.789474
12	M 1129	1.10582	0.201667	0.199165	0.196694	0.819559	0.0633333	0.728571
13	M 1209	0.149507	0.178333	0.178302	0.178271	0.656853	0.00666667	0.963303
14	M 1316	0.0536062	0.125833	0.125831	0.125828	0.327135	0.00166667	0.986842
15	M 1443	0.850631	0.135833	0.134907	0.133988	0.376033	0.0316667	0.791209
16	M 209	-0.490852	0.146667	0.14643	0.146193	0.44301	-0.0166667	1.12048
17	M 512	1.5882	0.158333	0.153623	0.149053	0.487603	0.0766667	0.610169
18	M 961	-0.231481	0.150833	0.150776	0.150718	0.469697	-0.00833333	1.05682
19	MH 810	0.827546	0.191667	0.190438	0.189217	0.749311	0.0433333	0.796875
20	MH 934	0	0.156667	0.156667	0.156667	0.507117	0	1
21	ML 1451	0.0579645	0.162833	0.162829	0.162825	0.547796	0.00233333	0.985772
22	ML 1666	-0.0823045	0.166667	0.166658	0.16665	0.573864	-0.00333333	1.0202
23	ML 818	0.873016	0.208333	0.206828	0.205333	0.883838	0.05	0.785714
24	MUSKAN	1.43791	0.186667	0.182331	0.178095	0.686869	0.08	0.647059
25	PDM 139	0.916667	0.236667	0.234758	0.232864	1.13866	0.06	0.775
26	PLM 167	0.86072	0.211667	0.210185	0.208714	0.912764	0.05	0.788732
27	PUSA 1031	0.634921	0.260333	0.259402	0.258474	1.39028	0.044	0.844156
28	PUSA 1132	1.33776	0.186667	0.18303	0.179464	0.692149	0.0733333	0.671642
29	PUSA 1333	1.86314	0.421667	0.402713	0.384611	3.35078	0.25	0.542683
30	PUSA BAISAKHI	0.690521	0.18	0.179227	0.178457	0.663682	0.0333333	0.830508
31	PUSA RATNA	1.35802	0.241667	0.236784	0.232	1.1584	0.0966667	0.666667
32	PUSA VISHAL	1.91304	0.293333	0.279185	0.26572	1.61042	0.18	0.530435
33	RMG 1028	1.51135	0.168333	0.163911	0.159604	0.555096	0.0766667	0.629032
34	RMG 1087	0	0.166667	0.166667	0.166667	0.573921	0	1
35	V 04-04	1.79739	0.176667	0.169444	0.162516	0.593205	0.1	0.558824
36	V 6183	0.786225	0.171667	0.170685	0.169709	0.601928	0.0366667	0.807018
