# Supplementary material for: Comparison of different selection traits for identification of phosphorus use efficient lines in mungbean
Source: PeerJ. 2021 Oct 8;9:e12156. doi: 10.7717/peerj.12156 (PMC8504459; doi:10.7717/peerj.12156)
Supplement: Supplemental Information 10 [file peerj-09-12156-s010.xls]

## Sheet: TDW
S. No	Name	NP	LP
1	EC 520029	0.233333	0.12
2	EC 550851	0.156667	0.123333
3	GANGA 1	0.233333	0.173333
4	IC 282094	0.106667	0.09
5	IPM 02-17	0.28	0.196667
6	IPM 02-3	0.253333	0.22
7	IPM 205-4	0.226667	0.173333
8	KM 16-69	0.263333	0.22
9	KM 16-80	0.233333	0.16
10	LGG 460	0.186667	0.143333
11	M 1032	0.19	0.15
12	M 1129	0.233333	0.17
13	M 1209	0.181667	0.175
14	M 1316	0.126667	0.125
15	M 1443	0.151667	0.12
16	M 209	0.138333	0.155
17	M 512	0.196667	0.12
18	M 961	0.146667	0.155
19	MH 810	0.213333	0.17
20	MH 934	0.156667	0.156667
21	ML 1451	0.164	0.161667
22	ML 1666	0.165	0.168333
23	ML 818	0.233333	0.183333
24	MUSKAN	0.226667	0.146667
25	PDM 139	0.266667	0.206667
26	PLM 167	0.236667	0.186667
27	PUSA 1031	0.282333	0.238333
28	PUSA 1132	0.223333	0.15
29	PUSA 1333	0.546667	0.296667
30	PUSA BAISAKHI	0.196667	0.163333
31	PUSA RATNA	0.29	0.193333
32	PUSA VISHAL	0.383333	0.203333
33	RMG 1028	0.206667	0.13
34	RMG 1087	0.166667	0.166667
35	V 04-04	0.226667	0.126667
36	V 6183	0.19	0.153333

## Sheet: SSI
S. No	Name	NP	LP	LP/NP	1-LP/NP	XLP/XNP	1-XLP/XNP	SSI	Mean	stdev				Name	SSI
1	EC 520029	0.233333	0.12	0.514286	0.485714	0.754545	0.245455	1.97884	0.855574	0.629859	1.78335	1.78335		M 209	-0.490852
2	EC 550851	0.156667	0.123333	0.787234	0.212766			0.866824			0.0178614	0.0178614		M 961	-0.231481
3	GANGA 1	0.233333	0.173333	0.742857	0.257143			1.04762			0.304901	0.304901		ML 1666	-0.0823045
4	IC 282094	0.106667	0.09	0.84375	0.15625			0.636574			-0.347697	-0.347697		MH 934	0
5	IPM 02-17	0.28	0.196667	0.702381	0.297619			1.21252			0.566711	0.566711		RMG 1087	0
6	IPM 02-3	0.253333	0.22	0.868421	0.131579			0.536062			-0.507275	-0.507275		M 1316	0.0536062
7	IPM 205-4	0.226667	0.173333	0.764706	0.235294			0.958606			0.163579	0.163579		ML 1451	0.0579645
8	KM 16-69	0.263333	0.22	0.835443	0.164557			0.670417			-0.293965	-0.293965		M 1209	0.149507
9	KM 16-80	0.233333	0.16	0.685714	0.314286			1.28042			0.674514	0.674514		IPM 02-3	0.536062
10	LGG 460	0.186667	0.143333	0.767857	0.232143			0.945767			0.143196	0.143196		PUSA 1031	0.634921
11	M 1032	0.19	0.15	0.789474	0.210526			0.8577			0.00337492	0.00337492		IC 282094	0.636574
12	M 1129	0.233333	0.17	0.728571	0.271429			1.10582			0.397305	0.397305		KM 16-69	0.670417
13	M 1209	0.181667	0.175	0.963303	0.0366972			0.149507			-1.12099	-1.12099		PUSA BAISAKHI	0.690521
14	M 1316	0.126667	0.125	0.986842	0.0131579			0.0536062			-1.27325	-1.27325		V 6183	0.786225
15	M 1443	0.151667	0.12	0.791209	0.208791			0.850631			-0.00784815	-0.00784815		MH 810	0.827546
16	M 209	0.138333	0.155	1.12048	-0.120482			-0.490852			-2.13766	-2.13766		M 1443	0.850631
17	M 512	0.196667	0.12	0.610169	0.389831			1.5882			1.16316	1.16316		M 1032	0.8577
18	M 961	0.146667	0.155	1.05682	-0.0568182			-0.231481			-1.72587	-1.72587		PLM 167	0.86072
19	MH 810	0.213333	0.17	0.796875	0.203125			0.827546			-0.0444985	-0.0444985		EC 550851	0.866824
20	MH 934	0.156667	0.156667	1	0			0			-1.35836	-1.35836		ML 818	0.873016
21	ML 1451	0.164	0.161667	0.985772	0.0142276			0.0579645			-1.26633	-1.26633		PDM 139	0.916667
22	ML 1666	0.165	0.168333	1.0202	-0.020202			-0.0823045			-1.48903	-1.48903		LGG 460	0.945767
23	ML 818	0.233333	0.183333	0.785714	0.214286			0.873016			0.0276916	0.0276916		IPM 205-4	0.958606
24	MUSKAN	0.226667	0.146667	0.647059	0.352941			1.43791			0.924547	0.924547		GANGA 1	1.04762
25	PDM 139	0.266667	0.206667	0.775	0.225			0.916667			0.096994	0.096994		M 1129	1.10582
26	PLM 167	0.236667	0.186667	0.788732	0.211268			0.86072			0.00816975	0.00816975		IPM 02-17	1.21252
27	PUSA 1031	0.282333	0.238333	0.844156	0.155844			0.634921			-0.350322	-0.350322		KM 16-80	1.28042
28	PUSA 1132	0.223333	0.15	0.671642	0.328358			1.33776			0.765538	0.765538		PUSA 1132	1.33776
29	PUSA 1333	0.546667	0.296667	0.542683	0.457317			1.86314			1.59967	1.59967		PUSA RATNA	1.35802
30	PUSA BAISAKHI	0.196667	0.163333	0.830508	0.169492			0.690521			-0.262047	-0.262047		MUSKAN	1.43791
31	PUSA RATNA	0.29	0.193333	0.666667	0.333333			1.35802			0.797719	0.797719		RMG 1028	1.51135
32	PUSA VISHAL	0.383333	0.203333	0.530435	0.469565			1.91304			1.6789	1.6789		M 512	1.5882
33	RMG 1028	0.206667	0.13	0.629032	0.370968			1.51135			1.04115	1.04115		V 04-04	1.79739
34	RMG 1087	0.166667	0.166667	1	0			0			-1.35836	-1.35836		PUSA 1333	1.86314
35	V 04-04	0.226667	0.126667	0.558824	0.441176			1.79739			1.49527	1.49527		PUSA VISHAL	1.91304
36	V 6183	0.19	0.153333	0.807018	0.192982			0.786225			-0.110103	-0.110103		EC 520029	1.97884

## Sheet: MPI
S. No	Name	NP	LP	NP+LP	(NP+LP)/2	Mean	stdev	STANDARD
1	EC 520029	0.233333	0.12	0.353333	0.176667	0.19312	0.0560591	-0.293506
2	EC 550851	0.156667	0.123333	0.28	0.14			-0.947577
3	GANGA 1	0.233333	0.173333	0.406667	0.203333			0.182182
4	IC 282094	0.106667	0.09	0.196667	0.0983333			-1.69084
5	IPM 02-17	0.28	0.196667	0.476667	0.238333			0.806523
6	IPM 02-3	0.253333	0.22	0.473333	0.236667			0.776792
7	IPM 205-4	0.226667	0.173333	0.4	0.2			0.122721
8	KM 16-69	0.263333	0.22	0.483333	0.241667			0.865984
9	KM 16-80	0.233333	0.16	0.393333	0.196667			0.0632599
10	LGG 460	0.186667	0.143333	0.33	0.165			-0.50162
11	M 1032	0.19	0.15	0.34	0.17			-0.412428
12	M 1129	0.233333	0.17	0.403333	0.201667			0.152451
13	M 1209	0.181667	0.175	0.356667	0.178333			-0.263776
14	M 1316	0.126667	0.125	0.251667	0.125833			-1.20029
15	M 1443	0.151667	0.12	0.271667	0.135833			-1.0219
16	M 209	0.138333	0.155	0.293333	0.146667			-0.828655
17	M 512	0.196667	0.12	0.316667	0.158333			-0.620542
18	M 961	0.146667	0.155	0.301667	0.150833			-0.754329
19	MH 810	0.213333	0.17	0.383333	0.191667			-0.0259316
20	MH 934	0.156667	0.156667	0.313333	0.156667			-0.650272
21	ML 1451	0.164	0.161667	0.325667	0.162833			-0.540269
22	ML 1666	0.165	0.168333	0.333333	0.166667			-0.471889
23	ML 818	0.233333	0.183333	0.416667	0.208333			0.271373
24	MUSKAN	0.226667	0.146667	0.373333	0.186667			-0.115123
25	PDM 139	0.266667	0.206667	0.473333	0.236667			0.776792
26	PLM 167	0.236667	0.186667	0.423333	0.211667			0.330835
27	PUSA 1031	0.282333	0.238333	0.520667	0.260333			1.19897
28	PUSA 1132	0.223333	0.15	0.373333	0.186667			-0.115123
29	PUSA 1333	0.546667	0.296667	0.843333	0.421667			4.07688
30	PUSA BAISAKHI	0.196667	0.163333	0.36	0.18			-0.234045
31	PUSA RATNA	0.29	0.193333	0.483333	0.241667			0.865984
32	PUSA VISHAL	0.383333	0.203333	0.586667	0.293333			1.78763
33	RMG 1028	0.206667	0.13	0.336667	0.168333			-0.442159
34	RMG 1087	0.166667	0.166667	0.333333	0.166667			-0.471889
35	V 04-04	0.226667	0.126667	0.353333	0.176667			-0.293506
36	V 6183	0.19	0.153333	0.343333	0.171667			-0.382698

## Sheet: GMPI
S. No	Name	NP	LP	NP*LP	SQRTNP*LP	mean	sd	standra
1	EC 520029	0.233333	0.12	0.028	0.167332	0.190318	0.0532614	-0.431574
2	EC 550851	0.156667	0.123333	0.0193222	0.139004			-0.963433
3	GANGA 1	0.233333	0.173333	0.0404444	0.201108			0.202582
4	IC 282094	0.106667	0.09	0.0096	0.0979796			-1.73369
5	IPM 02-17	0.28	0.196667	0.0550667	0.234663			0.832584
6	IPM 02-3	0.253333	0.22	0.0557333	0.236079			0.859174
7	IPM 205-4	0.226667	0.173333	0.0392889	0.198214			0.14825
8	KM 16-69	0.263333	0.22	0.0579333	0.240693			0.94581
9	KM 16-80	0.233333	0.16	0.0373333	0.193218			0.0544507
10	LGG 460	0.186667	0.143333	0.0267556	0.163571			-0.502183
11	M 1032	0.19	0.15	0.0285	0.168819			-0.403647
12	M 1129	0.233333	0.17	0.0396667	0.199165			0.166099
13	M 1209	0.181667	0.175	0.0317917	0.178302			-0.225605
14	M 1316	0.126667	0.125	0.0158333	0.125831			-1.21078
15	M 1443	0.151667	0.12	0.0182	0.134907			-1.04036
16	M 209	0.138333	0.155	0.0214417	0.14643			-0.82402
17	M 512	0.196667	0.12	0.0236	0.153623			-0.688966
18	M 961	0.146667	0.155	0.0227333	0.150776			-0.742422
19	MH 810	0.213333	0.17	0.0362667	0.190438			0.00225034
20	MH 934	0.156667	0.156667	0.0245444	0.156667			-0.631819
21	ML 1451	0.164	0.161667	0.0265133	0.162829			-0.516116
22	ML 1666	0.165	0.168333	0.027775	0.166658			-0.444222
23	ML 818	0.233333	0.183333	0.0427778	0.206828			0.309974
24	MUSKAN	0.226667	0.146667	0.0332444	0.182331			-0.14997
25	PDM 139	0.266667	0.206667	0.0551111	0.234758			0.834362
26	PLM 167	0.236667	0.186667	0.0441778	0.210185			0.373007
27	PUSA 1031	0.282333	0.238333	0.0672894	0.259402			1.29707
28	PUSA 1132	0.223333	0.15	0.0335	0.18303			-0.136838
29	PUSA 1333	0.546667	0.296667	0.162178	0.402713			3.98778
30	PUSA BAISAKHI	0.196667	0.163333	0.0321222	0.179227			-0.208246
31	PUSA RATNA	0.29	0.193333	0.0560667	0.236784			0.872409
32	PUSA VISHAL	0.383333	0.203333	0.0779444	0.279185			1.66851
33	RMG 1028	0.206667	0.13	0.0268667	0.163911			-0.495813
34	RMG 1087	0.166667	0.166667	0.0277778	0.166667			-0.444065
35	V 04-04	0.226667	0.126667	0.0287111	0.169444			-0.391929
36	V 6183	0.19	0.153333	0.0291333	0.170685			-0.368622

## Sheet: HMI
S. No	Name	NP	LP	NP*LP	2(NP*LP)	NP+LP	HMI	MEAN	SD	STAND
1	EC 520029	0.233333	0.12	0.028	0.056	0.353333	0.158491	0.187603	0.0507431	-0.573726
2	EC 550851	0.156667	0.123333	0.0193222	0.0386444	0.28	0.138016			-0.977224
3	GANGA 1	0.233333	0.173333	0.0404444	0.0808889	0.406667	0.198907			0.222768
4	IC 282094	0.106667	0.09	0.0096	0.0192	0.196667	0.0976271			-1.77317
5	IPM 02-17	0.28	0.196667	0.0550667	0.110133	0.476667	0.231049			0.856191
6	IPM 02-3	0.253333	0.22	0.0557333	0.111467	0.473333	0.235493			0.94377
7	IPM 205-4	0.226667	0.173333	0.0392889	0.0785778	0.4	0.196444			0.174236
8	KM 16-69	0.263333	0.22	0.0579333	0.115867	0.483333	0.239724			1.02715
9	KM 16-80	0.233333	0.16	0.0373333	0.0746667	0.393333	0.189831			0.0438939
10	LGG 460	0.186667	0.143333	0.0267556	0.0535111	0.33	0.162155			-0.501513
11	M 1032	0.19	0.15	0.0285	0.057	0.34	0.167647			-0.393278
12	M 1129	0.233333	0.17	0.0396667	0.0793333	0.403333	0.196694			0.179158
13	M 1209	0.181667	0.175	0.0317917	0.0635833	0.356667	0.178271			-0.18391
14	M 1316	0.126667	0.125	0.0158333	0.0316667	0.251667	0.125828			-1.21742
15	M 1443	0.151667	0.12	0.0182	0.0364	0.271667	0.133988			-1.05661
16	M 209	0.138333	0.155	0.0214417	0.0428833	0.293333	0.146193			-0.816073
17	M 512	0.196667	0.12	0.0236	0.0472	0.316667	0.149053			-0.759721
18	M 961	0.146667	0.155	0.0227333	0.0454667	0.301667	0.150718			-0.726897
19	MH 810	0.213333	0.17	0.0362667	0.0725333	0.383333	0.189217			0.0318111
20	MH 934	0.156667	0.156667	0.0245444	0.0490889	0.313333	0.156667			-0.60967
21	ML 1451	0.164	0.161667	0.0265133	0.0530267	0.325667	0.162825			-0.488308
22	ML 1666	0.165	0.168333	0.027775	0.05555	0.333333	0.16665			-0.412927
23	ML 818	0.233333	0.183333	0.0427778	0.0855556	0.416667	0.205333			0.34941
24	MUSKAN	0.226667	0.146667	0.0332444	0.0664889	0.373333	0.178095			-0.187375
25	PDM 139	0.266667	0.206667	0.0551111	0.110222	0.473333	0.232864			0.891957
26	PLM 167	0.236667	0.186667	0.0441778	0.0883556	0.423333	0.208714			0.416032
27	PUSA 1031	0.282333	0.238333	0.0672894	0.134579	0.520667	0.258474			1.39666
28	PUSA 1132	0.223333	0.15	0.0335	0.067	0.373333	0.179464			-0.160395
29	PUSA 1333	0.546667	0.296667	0.162178	0.324356	0.843333	0.384611			3.88246
30	PUSA BAISAKHI	0.196667	0.163333	0.0321222	0.0642444	0.36	0.178457			-0.180249
31	PUSA RATNA	0.29	0.193333	0.0560667	0.112133	0.483333	0.232			0.874933
32	PUSA VISHAL	0.383333	0.203333	0.0779444	0.155889	0.586667	0.26572			1.53945
33	RMG 1028	0.206667	0.13	0.0268667	0.0537333	0.336667	0.159604			-0.551785
34	RMG 1087	0.166667	0.166667	0.0277778	0.0555556	0.333333	0.166667			-0.412599
35	V 04-04	0.226667	0.126667	0.0287111	0.0574222	0.353333	0.162516			-0.494402
36	V 6183	0.19	0.153333	0.0291333	0.0582667	0.343333	0.169709			-0.352648

## Sheet: STI
S. No	Name	NP	LP	NP*LP	XNP	XNP2	STI	MEAN	SD	STAND
1	EC 520029	0.233333	0.12	0.028	0.22	0.0484	0.578512	0.805351	0.535748	-0.423406
2	EC 550851	0.156667	0.123333	0.0193222			0.399219			-0.758065
3	GANGA 1	0.233333	0.173333	0.0404444			0.835629			0.0565145
4	IC 282094	0.106667	0.09	0.0096			0.198347			-1.133
5	IPM 02-17	0.28	0.196667	0.0550667			1.13774			0.620421
6	IPM 02-3	0.253333	0.22	0.0557333			1.15152			0.646131
7	IPM 205-4	0.226667	0.173333	0.0392889			0.811754			0.0119504
8	KM 16-69	0.263333	0.22	0.0579333			1.19697			0.730975
9	KM 16-80	0.233333	0.16	0.0373333			0.77135			-0.0634657
10	LGG 460	0.186667	0.143333	0.0267556			0.552801			-0.471398
11	M 1032	0.19	0.15	0.0285			0.588843			-0.404124
12	M 1129	0.233333	0.17	0.0396667			0.819559			0.0265194
13	M 1209	0.181667	0.175	0.0317917			0.656853			-0.27718
14	M 1316	0.126667	0.125	0.0158333			0.327135			-0.892615
15	M 1443	0.151667	0.12	0.0182			0.376033			-0.801344
16	M 209	0.138333	0.155	0.0214417			0.44301			-0.676329
17	M 512	0.196667	0.12	0.0236			0.487603			-0.593093
18	M 961	0.146667	0.155	0.0227333			0.469697			-0.626516
19	MH 810	0.213333	0.17	0.0362667			0.749311			-0.104602
20	MH 934	0.156667	0.156667	0.0245444			0.507117			-0.55667
21	ML 1451	0.164	0.161667	0.0265133			0.547796			-0.48074
22	ML 1666	0.165	0.168333	0.027775			0.573864			-0.432083
23	ML 818	0.233333	0.183333	0.0427778			0.883838			0.1465
24	MUSKAN	0.226667	0.146667	0.0332444			0.686869			-0.221154
25	PDM 139	0.266667	0.206667	0.0551111			1.13866			0.622135
26	PLM 167	0.236667	0.186667	0.0441778			0.912764			0.200491
27	PUSA 1031	0.282333	0.238333	0.0672894			1.39028			1.09179
28	PUSA 1132	0.223333	0.15	0.0335			0.692149			-0.211298
29	PUSA 1333	0.546667	0.296667	0.162178			3.35078			4.75117
30	PUSA BAISAKHI	0.196667	0.163333	0.0321222			0.663682			-0.264433
31	PUSA RATNA	0.29	0.193333	0.0560667			1.1584			0.658986
32	PUSA VISHAL	0.383333	0.203333	0.0779444			1.61042			1.5027
33	RMG 1028	0.206667	0.13	0.0268667			0.555096			-0.467113
34	RMG 1087	0.166667	0.166667	0.0277778			0.573921			-0.431976
35	V 04-04	0.226667	0.126667	0.0287111			0.593205			-0.395982
36	V 6183	0.19	0.153333	0.0291333			0.601928			-0.379699

## Sheet: TI
S. No	Name	NP	LP	NP-LP	MEAN	SD	STAND
1	EC 520029	0.233333	0.12	0.113333	0.0533704	0.0520978	1.15097
2	EC 550851	0.156667	0.123333	0.0333333			-0.384604
3	GANGA 1	0.233333	0.173333	0.06			0.127253
4	IC 282094	0.106667	0.09	0.0166667			-0.704515
5	IPM 02-17	0.28	0.196667	0.0833333			0.575129
6	IPM 02-3	0.253333	0.22	0.0333333			-0.384604
7	IPM 205-4	0.226667	0.173333	0.0533333			-0.000710913
8	KM 16-69	0.263333	0.22	0.0433333			-0.192658
9	KM 16-80	0.233333	0.16	0.0733333			0.383182
10	LGG 460	0.186667	0.143333	0.0433333			-0.192658
11	M 1032	0.19	0.15	0.04			-0.25664
12	M 1129	0.233333	0.17	0.0633333			0.191236
13	M 1209	0.181667	0.175	0.00666667			-0.896462
14	M 1316	0.126667	0.125	0.00166667			-0.992435
15	M 1443	0.151667	0.12	0.0316667			-0.416595
16	M 209	0.138333	0.155	-0.0166667			-1.34434
17	M 512	0.196667	0.12	0.0766667			0.447165
18	M 961	0.146667	0.155	-0.00833333			-1.18438
19	MH 810	0.213333	0.17	0.0433333			-0.192658
20	MH 934	0.156667	0.156667	0			-1.02443
21	ML 1451	0.164	0.161667	0.00233333			-0.979639
22	ML 1666	0.165	0.168333	-0.00333333			-1.08841
23	ML 818	0.233333	0.183333	0.05			-0.0646931
24	MUSKAN	0.226667	0.146667	0.08			0.511147
25	PDM 139	0.266667	0.206667	0.06			0.127253
26	PLM 167	0.236667	0.186667	0.05			-0.0646931
27	PUSA 1031	0.282333	0.238333	0.044			-0.179861
28	PUSA 1132	0.223333	0.15	0.0733333			0.383182
29	PUSA 1333	0.546667	0.296667	0.25			3.77424
30	PUSA BAISAKHI	0.196667	0.163333	0.0333333			-0.384604
31	PUSA RATNA	0.29	0.193333	0.0966667			0.831058
32	PUSA VISHAL	0.383333	0.203333	0.18			2.43061
33	RMG 1028	0.206667	0.13	0.0766667			0.447165
34	RMG 1087	0.166667	0.166667	0			-1.02443
35	V 04-04	0.226667	0.126667	0.1			0.89504
36	V 6183	0.19	0.153333	0.0366667			-0.320622

## Sheet: SI
S. No	Name	NP	LP	LP/NP	MEAN	SD	STAND
1	EC 520029	0.233333	0.12	0.514286	0.789995	0.154602	-1.78335
2	EC 550851	0.156667	0.123333	0.787234			-0.0178614
3	GANGA 1	0.233333	0.173333	0.742857			-0.304901
4	IC 282094	0.106667	0.09	0.84375			0.347697
5	IPM 02-17	0.28	0.196667	0.702381			-0.566711
6	IPM 02-3	0.253333	0.22	0.868421			0.507275
7	IPM 205-4	0.226667	0.173333	0.764706			-0.163579
8	KM 16-69	0.263333	0.22	0.835443			0.293965
9	KM 16-80	0.233333	0.16	0.685714			-0.674514
10	LGG 460	0.186667	0.143333	0.767857			-0.143196
11	M 1032	0.19	0.15	0.789474			-0.00337492
12	M 1129	0.233333	0.17	0.728571			-0.397305
13	M 1209	0.181667	0.175	0.963303			1.12099
14	M 1316	0.126667	0.125	0.986842			1.27325
15	M 1443	0.151667	0.12	0.791209			0.00784815
16	M 209	0.138333	0.155	1.12048			2.13766
17	M 512	0.196667	0.12	0.610169			-1.16316
18	M 961	0.146667	0.155	1.05682			1.72587
19	MH 810	0.213333	0.17	0.796875			0.0444985
20	MH 934	0.156667	0.156667	1			1.35836
21	ML 1451	0.164	0.161667	0.985772			1.26633
22	ML 1666	0.165	0.168333	1.0202			1.48903
23	ML 818	0.233333	0.183333	0.785714			-0.0276916
24	MUSKAN	0.226667	0.146667	0.647059			-0.924547
25	PDM 139	0.266667	0.206667	0.775			-0.096994
26	PLM 167	0.236667	0.186667	0.788732			-0.00816975
27	PUSA 1031	0.282333	0.238333	0.844156			0.350322
28	PUSA 1132	0.223333	0.15	0.671642			-0.765538
29	PUSA 1333	0.546667	0.296667	0.542683			-1.59967
30	PUSA BAISAKHI	0.196667	0.163333	0.830508			0.262047
31	PUSA RATNA	0.29	0.193333	0.666667			-0.797719
32	PUSA VISHAL	0.383333	0.203333	0.530435			-1.6789
33	RMG 1028	0.206667	0.13	0.629032			-1.04115
34	RMG 1087	0.166667	0.166667	1			1.35836
35	V 04-04	0.226667	0.126667	0.558824			-1.49527
36	V 6183	0.19	0.153333	0.807018			0.110103

## Sheet: STS
S. No	Name	SSI	MPI	GMPI	HMI	STI	TI	SI	STS		Name	STS
1	EC 520029	1.78335	-0.293506	-0.431574	-0.573726	-0.423406	1.15097	-1.78335	-2.3546		IC 282094	-6.68752
2	EC 550851	0.0178614	-0.947577	-0.963433	-0.977224	-0.758065	-0.384604	-0.0178614	-4.04877		M 1443	-4.32896
3	GANGA 1	0.304901	0.182182	0.202582	0.222768	0.0565145	0.127253	-0.304901	0.486398		M 1316	-4.24028
4	IC 282094	-0.347697	-1.69084	-1.73369	-1.77317	-1.133	-0.704515	0.347697	-6.68752		EC 550851	-4.04877
5	IPM 02-17	0.566711	0.806523	0.832584	0.856191	0.620421	0.575129	-0.566711	3.12414		M 512	-3.37831
6	IPM 02-3	-0.507275	0.776792	0.859174	0.94377	0.646131	-0.384604	0.507275	3.34854		RMG 1028	-2.55085
7	IPM 205-4	0.163579	0.122721	0.14825	0.174236	0.0119504	-0.000710913	-0.163579	0.292867		EC 520029	-2.3546
8	KM 16-69	-0.293965	0.865984	0.94581	1.02715	0.730975	-0.192658	0.293965	3.67123		M 209	-2.35175
9	KM 16-80	0.674514	0.0632599	0.0544507	0.0438939	-0.0634657	0.383182	-0.674514	-0.193193		LGG 460	-2.31257
10	LGG 460	0.143196	-0.50162	-0.502183	-0.501513	-0.471398	-0.192658	-0.143196	-2.31257		M 961	-2.30868
11	M 1032	0.00337492	-0.412428	-0.403647	-0.393278	-0.404124	-0.25664	-0.00337492	-1.87349		V 04-04	-2.17605
12	M 1129	0.397305	0.152451	0.166099	0.179158	0.0265194	0.191236	-0.397305	0.318159		MH 934	-2.1145
13	M 1209	-1.12099	-0.263776	-0.225605	-0.18391	-0.27718	-0.896462	1.12099	-0.725942		M 1032	-1.87349
14	M 1316	-1.27325	-1.20029	-1.21078	-1.21742	-0.892615	-0.992435	1.27325	-4.24028		ML 1451	-1.73874
15	M 1443	-0.00784815	-1.0219	-1.04036	-1.05661	-0.801344	-0.416595	0.00784815	-4.32896		V 6183	-1.69419
16	M 209	-2.13766	-0.828655	-0.82402	-0.816073	-0.676329	-1.34434	2.13766	-2.35175		RMG 1087	-1.4266
17	M 512	1.16316	-0.620542	-0.688966	-0.759721	-0.593093	0.447165	-1.16316	-3.37831		ML 1666	-1.3605
18	M 961	-1.72587	-0.754329	-0.742422	-0.726897	-0.626516	-1.18438	1.72587	-2.30868		MUSKAN	-1.08702
19	MH 810	-0.0444985	-0.0259316	0.00225034	0.0318111	-0.104602	-0.192658	0.0444985	-0.244631		PUSA BAISAKHI	-1.00953
20	MH 934	-1.35836	-0.650272	-0.631819	-0.60967	-0.55667	-1.02443	1.35836	-2.1145		PUSA 1132	-1.00601
21	ML 1451	-1.26633	-0.540269	-0.516116	-0.488308	-0.48074	-0.979639	1.26633	-1.73874		M 1209	-0.725942
22	ML 1666	-1.48903	-0.471889	-0.444222	-0.412927	-0.432083	-1.08841	1.48903	-1.3605		MH 810	-0.244631
23	ML 818	0.0276916	0.271373	0.309974	0.34941	0.1465	-0.0646931	-0.0276916	0.984872		KM 16-80	-0.193193
24	MUSKAN	0.924547	-0.115123	-0.14997	-0.187375	-0.221154	0.511147	-0.924547	-1.08702		IPM 205-4	0.292867
25	PDM 139	0.096994	0.776792	0.834362	0.891957	0.622135	0.127253	-0.096994	3.15551		M 1129	0.318159
26	PLM 167	0.00816975	0.330835	0.373007	0.416032	0.200491	-0.0646931	-0.00816975	1.2475		GANGA 1	0.486398
27	PUSA 1031	-0.350322	1.19897	1.29707	1.39666	1.09179	-0.179861	0.350322	5.15495		ML 818	0.984872
28	PUSA 1132	0.765538	-0.115123	-0.136838	-0.160395	-0.211298	0.383182	-0.765538	-1.00601		PLM 167	1.2475
29	PUSA 1333	1.59967	4.07688	3.98778	3.88246	4.75117	3.77424	-1.59967	18.8729		IPM 02-17	3.12414
30	PUSA BAISAKHI	-0.262047	-0.234045	-0.208246	-0.180249	-0.264433	-0.384604	0.262047	-1.00953		PDM 139	3.15551
31	PUSA RATNA	0.797719	0.865984	0.872409	0.874933	0.658986	0.831058	-0.797719	3.30565		PUSA RATNA	3.30565
32	PUSA VISHAL	1.6789	1.78763	1.66851	1.53945	1.5027	2.43061	-1.6789	7.25001		IPM 02-3	3.34854
33	RMG 1028	1.04115	-0.442159	-0.495813	-0.551785	-0.467113	0.447165	-1.04115	-2.55085		KM 16-69	3.67123
34	RMG 1087	-1.35836	-0.471889	-0.444065	-0.412599	-0.431976	-1.02443	1.35836	-1.4266		PUSA 1031	5.15495
35	V 04-04	1.49527	-0.293506	-0.391929	-0.494402	-0.395982	0.89504	-1.49527	-2.17605		PUSA VISHAL	7.25001
36	V 6183	-0.110103	-0.382698	-0.368622	-0.352648	-0.379699	-0.320622	0.110103	-1.69419		PUSA 1333	18.8729
